# New measures of agency from an adaptive sensorimotor task

Shiyun Wang<sup>1</sup>, Sivananda Rajananda<sup>1</sup>, Hakwan Lau<sup>1,2,3,4</sup>, J. D. Knotts<sup>1\*</sup>

<sup>1</sup> Department of Psychology, University of California, Los Angeles, Los Angeles, California,  
United States of America

<sup>2</sup> Brain Research Institute, University of California, Los Angeles, Los Angeles, California, United  
States of America

<sup>3</sup> Department of Psychology, University of Hong Kong, Pok Fu Lam, Hong Kong

<sup>4</sup> State Key Laboratory of Brain and Cognitive Science, University of Hong Kong, Pok Fu Lam,  
Hong Kong

\* Corresponding author

E-mail: [jeffrejdknotts@gmail.com](mailto:jeffrejdknotts@gmail.com) (JDK)

## Abstract

Self-agency, the sense that one is the author or owner of one's behaviors, is impaired in multiple psychological and neurological disorders, including functional movement disorders, Parkinson's Disease, alien hand syndrome, schizophrenia, and dystonia. Existing assessments of self-agency, many of which focus on agency of movement, can be prohibitively time-consuming and often yield ambiguous results. Here, we introduce a short online motion tracking task that quantifies movement agency through both first-order perceptual and second-order metacognitive judgments. The task assesses the degree to which a participant can distinguish between a motion stimulus whose trajectory is influenced by the participant's cursor movements and a motion stimulus whose trajectory is random. We demonstrate the task's reliability in healthy participants and discuss how its efficiency, reliability, and ease of online implementation make it a promising new tool for both diagnosing and understanding disorders of agency.

## Introduction

Self-agency refers to the feeling that one is the cause of their behaviors [1]. Impairments in self-agency have been observed in multiple psychological and neurological disorders, such as functional movement disorders (FMDs) [2], Parkinson's disease [3], alien hand syndrome [4], schizophrenia [5], and dystonia [6]. However, existing measurements of agency are rarely applied in diagnosis due to concerns of unreliability [7-9]. Behavioral tasks in general have been shown to have low test-retest reliability as measures of individual differences and predictors of real-life outcomes [10, 11], suggesting limited efficacy in diagnostic procedures. Moreover,

prominent behavioral measurements of agency contain their own specific limitations. For example, the Libet clock paradigm, which is widely used to assess movement-based self-agency in experimental settings [12], has been criticized for confounding perceived timing of voluntary movement initiation and execution with timing for memory processing [13], and for its general susceptibility to memory-based biases [14-16]. Taken together, this suggests that a reliable and unbiased behavioral method for assessing agency could represent a major step forward in the diagnosis of agency related disorders [17].

Among the disorders mentioned above, we focus on FMDs here, as their diagnosis is particularly challenging. FMDs are movement disorders characterized by body movements or postures that patients cannot control, and that have no known neurological basis [18]. The most prominent feature of FMDs is the lack of a sense of agency over body movements or postures [2]. A sense of agency is acquired if little or no discrepancy is observed between movement intention and sensory feedback [19]. However, patients with FMDs report impaired movement intention, which leads to a frequent mismatch between intention and feedback. For example -- setting concerns about the reliability of the Libet clock paradigm to the side temporarily -- in contrast to healthy controls, FMD patients show no difference in reported intention and movement times on the Libet clock paradigm [12, 20]. Further, the right temporo-parietal junction (rTPJ) is thought to contribute to the generation of self-agency by comparing the prediction of movements with actual sensory feedback [21, 22]. Decreased connectivity between the rTPJ and sensorimotor regions has been observed in FMD patients, therefore suggesting that an impairment in the ability to generate a sense of movement agency may underlie symptoms [23].

Current diagnosis of FMDs is ambiguous and time-consuming [24]. One challenge with FMD diagnosis is that about 25% of patients with FMDs have other neurological illnesses, including separate movement disorders with known neurological causes [25]. These separate movement disorders may hinder detection of FMDs given their similarity in symptoms. It is also difficult to determine whether certain psychological factors, such as anxiety, are causes or consequences of FMDs [24].

Though the Fahn and Williams clinical classification of FMDs is widely used [24, 26, 27], the diagnosis requires a large time investment. According to this diagnosis, an FMD patient's disorder should be "inconsistent over time or incongruent with a recognized [movement disorder], in association with other related features" [28, 29]. Confirmation of this criterion requires extended observation and a clinician's thorough understanding of all prominent types of movement disorders. Because the early diagnosis of FMDs can benefit recovery [24], a more efficient tool to supplement such procedures is in need.

In the current study, we introduce an adaptive online sensorimotor task, in which participants make agency judgments based on the extent to which their cursor movements affect otherwise randomly moving dots, to quantify their sense of movement agency, and validate its implementation in healthy participants. Providing an efficient and unbiased agency measure, this task has the potential to improve diagnostic efficacy not only for FMDs, but for agency-related disorders in general.

## Methods

### Participants

We conducted two experiments with minor procedural differences through Amazon Mechanical Turk (mTurk). In Experiment 1, the data of 99 participants (71 males, average age = 29.66) was collected, and 53 participants were included in the data analysis (23 males, average age = 35.40; see Exclusion Criteria). In Experiment 2, the data of 94 participants (49 males, average age = 36.89) was collected, and 54 participants (28 males, average age = 37.24) were included in the data analysis.

Participants received \$4 for finishing the task. People who partially completed the task were paid at a rate of \$4 per hour. An online consent form was given at the beginning of the study. The study was approved by the University of California, Los Angeles Institutional Review Board, and was carried out following the Declaration of Helsinki.

### Stimuli and Apparatus

On each trial, two moving dots (dot A and dot B) were presented within separate circles for 4 or 2.5 seconds, in Experiment 1 and Experiment 2, respectively (Fig 1A). Each dot had an independent, pseudorandom trajectory. While the dots were presented, the participant could move the cursor to influence the trajectory of one of the two dots, hereafter referred to as the target dot. The target dot (A or B) was determined randomly at the beginning of each trial.

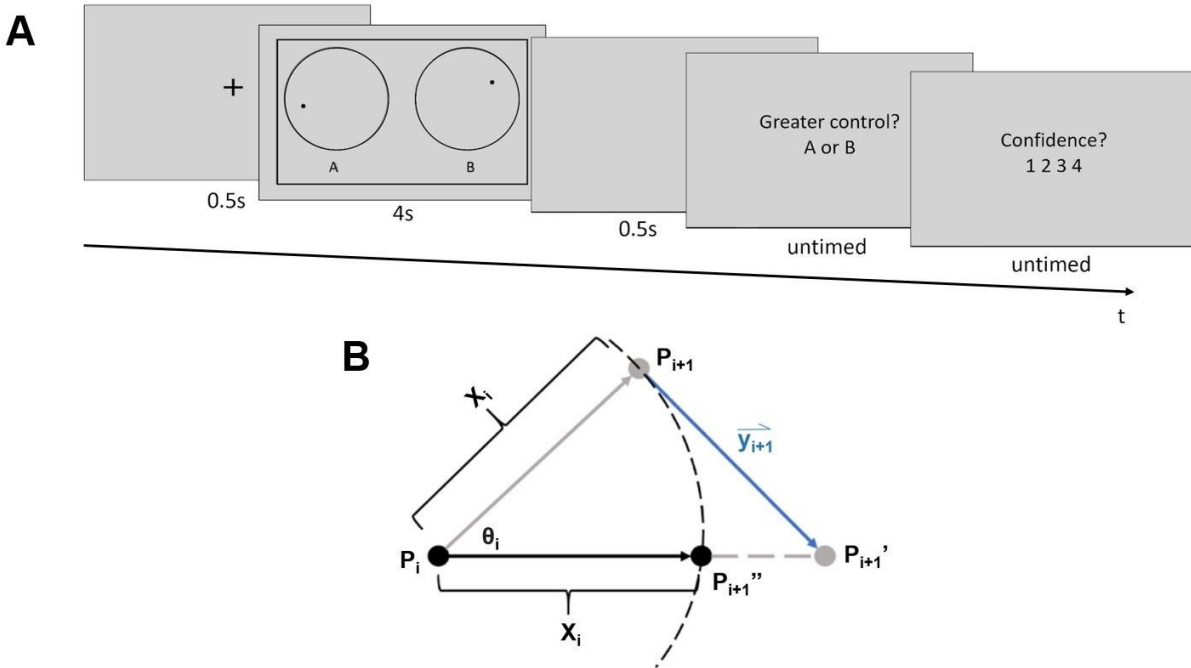

**Fig 1. Task procedure and calculation of dot trajectories.** A) Task procedure. At the beginning of each trial, a fixation cross was presented for 0.5 s, followed by the dot stimuli. When the dot stimuli were on the screen, participants could influence the moving trajectory of one of the dots with cursor movements. Then, after a blank screen (0.5 s), participants judged which of the dots they were better able to control (A or B), and how confident they were in this judgment on a scale from one to four. Font sizes are enlarged relative to their actual size during the experiment for clarity. B) Calculation of dot trajectories.  $X_i$  represents the distance of movement, which was randomly selected from a uniform distribution from 0.5 to 2.5 pixels on each new frame. An angle of movement ( $\theta_i$ ) from frame  $i$  to  $i+1$  was also generated for each dot at the beginning of each frame. It was randomly selected from a uniform distribution with a mean corresponding to the dot's angle of movement in the previous frame ( $\theta_{i-1}$ ) and a range corresponding to that mean  $\pm 11.75$  degrees.  $P_i$  represents the dot's location at the end of frame

$i-1$ . The dot was first moved along the angle  $\theta_i$  by the distance  $X_i$ , to point  $P_{i+1}$ , which corresponds to the *non-target* dot's final location. Vector  $y_{i+1}$  represents the mouse movement recorded during frame  $i-1$  multiplied by the subject's current control level, and was used to shift the *target dot* to position  $P_{i+1}'$ . The target dot's final position,  $P_{i+1}''$ , was then computed by finding the point along the line  $P_i P_{i+1}'$  that was  $X_i$  away from the dot's original location ( $P_i$ ).

Independent of cursor movements, random dot trajectories were computed as follows. The position of each dot was updated on each display frame. At onset, or frame  $i = 1$ , each dot appeared at the center of its respective circle. The initial angle of motion for each dot,  $\theta_{i=1}$  (Fig 1B), was randomly selected from a full 360-degree range. For successive display frames ( $i = 2$  to  $i = n-1$ , where  $n$  is the total number of frames over which the dot stimuli were displayed) new angles of motion  $\theta_i$  were randomly selected from a uniform distribution with a range of  $\theta_{i-1} \pm 11.75$  degrees. Movement distance from frames  $i$  to  $i+1$ ,  $X_i$ , (Fig 1B) was randomly selected from a uniform distribution from 0.5 to 2.5 pixels. Given a reference position,  $P$ , on display frame  $i$ , (Fig 1B, point  $P_i$ ), the dot's position on frame  $i+1$  (Fig 1B, point  $P_{i+1}$ ), was the dot's location after it moved along angle  $\theta_i$  at a distance of  $X_i$ .

Cursor movements affected the trajectory of the target dot as follows. Cursor movement at frame  $i+1$  was represented by a vector,  $y_{i+1}$  (Fig 1B), that pointed from the cursor's coordinates at the time point when the coordinates of point  $P_i$  were calculated (but before  $P_i$  was drawn), to the cursor's coordinates at the onset of frame  $i+1$ . The amount of control that cursor movements had over the target dot's trajectory varied from trial to trial. To implement this, the cursor

movement vector's length was multiplied by the participant's level of control (between 0 and 100 %) on a given trial.

The position of the target dot on frame  $i+1$  was computed by first moving the dot from position  $P_{i+1}$  along the adjusted mouse movement vector to a new position,  $P_{i+1}'$  (Fig 1B). The target dot's final display position on frame  $i+1$ ,  $P_{i+1}''$ , was computed by moving the dot toward point  $P_{i+1}'$  along the straight line connecting points  $P_i$  and  $P_{i+1}'$  by a distance of  $X_i$ .

If the non-target dot's computed position at frame  $i+1$  ( $P_{i+1}$ , Fig 1B) was outside its circular border (Fig 1A), its coordinates were re-calculated so as to make it appear to “bounce” off of the border. The new position was re-calculated by reflecting the coordinates over the tangent line of the circular border at the point where the dot was in the previous frame ( $P_i$ ). For the target dot, if its final position ( $P_{i+1}''$ ) is outside the border, its final coordinate will adopt the value of its old coordinates ( $P_i$ ). This was intended to minimize the extent to which the direction of cursor movements opposed the motion of the target dot.

Both dots were black and had a radius of 8 pixels. The cursor was hidden during the task to prevent participants from inferring the location of the target dot from cursor movement. If the cursor reached the edge of the screen, the corresponding side of an outer rectangular border (Fig 1A) changed color from black to red to alert participants that they had reached an edge of the area in which their cursor movements could be recorded.

Both experiments were conducted through mTurk. The experimental code was written in JavaScript and JsPsych (6.0.5). Participants performed the task with their personal computers.



## Procedure

On each trial in Experiment 1, a fixation cross was presented at the center of the screen for 0.5 seconds. Dot stimuli were then shown for 4 seconds. These were followed by a 0.5 s blank screen, after which participants answered two questions. They first indicated which dot, A or B, they were better able to control. Then, they reported their confidence in this agency judgment on a scale of one to four. A rating of one corresponded to a complete guess. A two meant that the judgment was better than a guess but the participant was unsure about it. A three meant that they were almost certain, and a four meant that they had no doubt in their judgment. Participants had unlimited time to respond.

Each session started with five practice trials that implemented an adaptive staircasing procedure [30]. The control level of the first practice trial was 25%, as pilot data confirmed that healthy subjects have 100% accuracy at this level. If the participant's answer on a given trial was correct, the control level was reduced by 2.5% for the next trial. If the answer was incorrect, the control level was increased by 7.5% for the next trial. Participants would repeat the whole set of practice trials if their total accuracy was below 80% correct.

Following the practice, the main task employed two randomly interleaved one-up/one-down adaptive staircases with differentially weighted step sizes [30]. The ratio of down- to up-step magnitudes following correct and incorrect responses, respectively, was 0.33. This procedure was designed to estimate the control level at which participants are 75% correct in their agency judgments.

The control level on the first trial of each staircase was 2.5% and the initial down step size was 0.5%. Reversal trials were trials in which accuracy was different from that of the

previous trial of the current staircase. For each staircase, the down step size was reduced to 0.25% after the second reversal, to 0.1% after the sixth reversal, and to 0.02% after the twelfth reversal. The experiment ended after both staircases accumulated 13 reversals. The maximum number of trials allowed was 100 trials in each staircase.

Experiment 2 was the same as Experiment 1 except for the following changes. To improve task efficiency, dot stimulus duration was decreased to 2.5 seconds, and participants only had 2 seconds to answer each question. Additionally, participants were given an optional break of up to 5 minutes in the middle of the task (after they had finished six reversal trials in both staircases). Finally, the last down step size was increased to 0.07% to prevent the staircasing procedure from becoming prematurely constrained to an overly narrow range of control values.

## Data Analysis

Percent control thresholds on the dot trajectory task were estimated by computing the average control level across the last five reversal trials in each staircase. The final control threshold estimation for each participant was the average of the two staircases' thresholds.

Participants' metacognitive sensitivity was quantified using the area under the Type 2 receiver operating characteristic curve (Type 2 AUROC) [31]. According to Signal Detection Theory, participants' tasks in the current paradigm can be divided into two types: identifying the target dot is considered a Type 1 task and reporting confidence is considered a Type 2 task. The Type 2 AUROC reflects subjects' ability to track their performance on the Type 1 task with confidence ratings [31]. A Type 2 AUROC of 0.5 indicates that the participant has no metacognitive sensitivity, while a Type 2 AUROC of 1 indicates optimal metacognitive

sensitivity (i.e., all correct responses are endorsed with high confidence while all incorrect responses are rated with low confidence).

Comparisons of control thresholds and Type 2 AUROC between the two experiments were made using two-tailed independent sample t-tests. An alpha level of .05 was used for all statistical tests. Statistical analyses were conducted in MATLAB R2018b (Natick, MA) and R version 3.6.0 (Vienna, Austria).

## **Exclusion Criteria**

Catch trials in which participants had a high level of control (25%) were randomly inserted in between staircasing trials such that they accounted for approximately 15% of the total trial number. In Experiment 1, participants who missed more than 40% of catch trials were excluded ( $N = 39$ ). Participants who used extreme confidence ratings (one or four) more than 95% of the time ( $N = 3$ ) were also excluded because such biases would impede a meaningful analysis of metacognitive scores [32]. No participant was excluded due to a control level threshold that was more than three standard deviations away from the mean threshold level across participants. We also excluded participants whose  $d'$  scores [32, 33] on the agency judgment task ( $N = 4$ ), computed with hits corresponding to correctly choosing dot A and correct rejections corresponding to correctly choosing dot B, were less than or equal to zero, as such scores imply a lack of effort.

Similar exclusion criteria were applied to participants in Experiment 2. Twenty-eight participants were excluded for missing more than 40% of the catch trials. Four participants were

excluded due to extreme confidence rating. No participants were excluded because of abnormal control level thresholds. Finally, eight participants were excluded for negative  $d'$  scores.

## Results

The distributions of percent control thresholds estimated in healthy participants in Experiments 1 ( $M = 1.90\%$ ,  $SD = 2.31\%$ ) and 2 ( $M = 1.47\%$ ,  $SD = 1.77\%$ ) are shown in Fig 2A and 2B, respectively. The reduction in stimulus duration and allotted response times from Experiment 1 to Experiment 2 did not significantly change observed control thresholds,  $t(97.52) = 1.07$ ,  $p = 0.29$ .

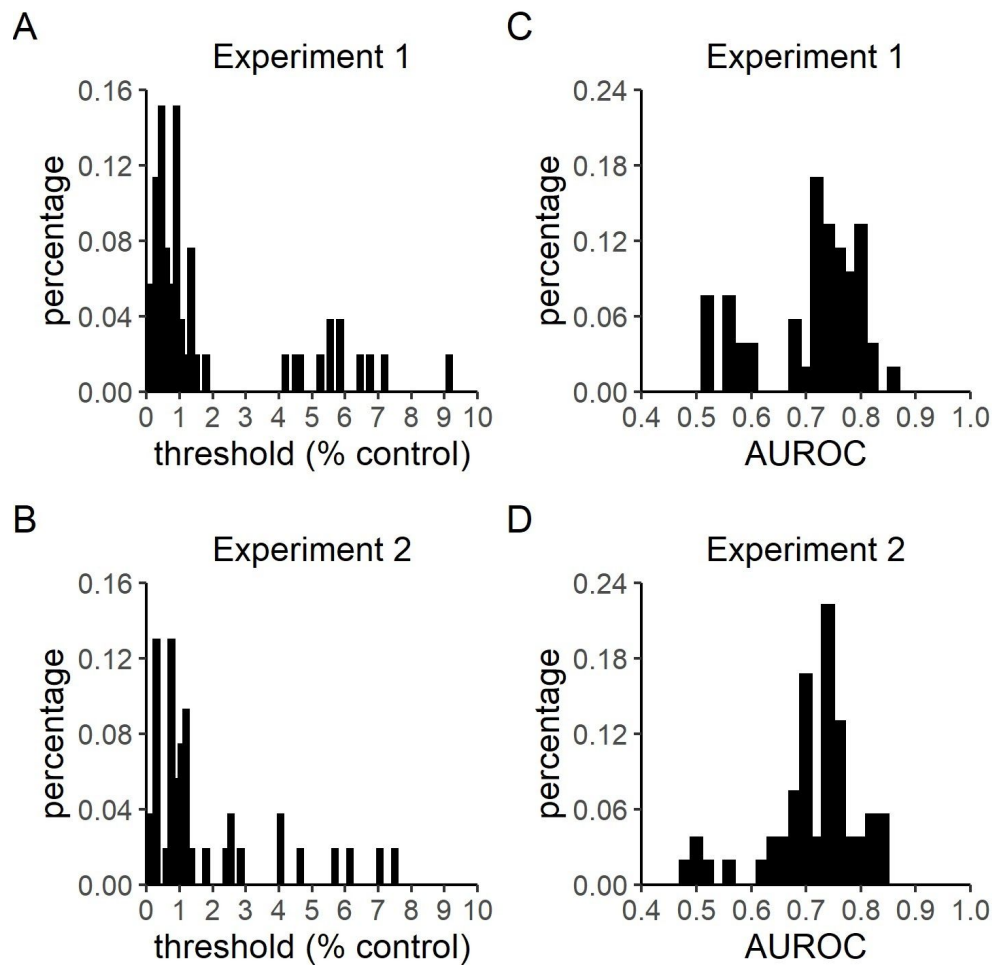

**Fig 2. Control threshold and Type 2 AUROC distributions.** Experiments 1 and 2 followed the trial procedure summarized in Figure 1, and had only slight differences in dot stimulus presentation time (4 versus 2.5 seconds, respectively), allotted response times (untimed versus 2 seconds, respectively), final staircasing step size (0.02% versus 0.07% control, respectively), and the availability of a midway break (Experiment 2 only). A) Control level thresholds in Experiment 1 ( $M = 1.90\%$ ,  $SD = 2.31\%$ ). B) Control level thresholds in Experiment 2 ( $M = 1.47\%$ ,  $SD = 1.77\%$ ). C) Type 2 AUROC in Experiment 1 ( $M = 0.71$ ,  $SD = 0.09$ ). D) Type 2 AUROC in Experiment 2 ( $M = 0.72$ ,  $SD = 0.08$ ). Bin sizes for threshold and AUROC histograms are 0.15 and 0.02, respectively.

The trial counts in these experiments (Experiment 1:  $M = 83.64$ ,  $SD = 21.93$ ; Experiment 2:  $M = 83.61$ ,  $SD = 22.25$ ) were lower than that recommended for the unbiased metacognitive sensitivity estimation procedure used to estimate meta- $d'$  [32]. Therefore, the method of Type 2 sensitivity estimation used here (Type 2 AUROC) is susceptible to being biased by Type 1 performance. Because the control levels at the start of each thresholding procedure were high by design, participants' Type 1 performance before the third reversal trial was relatively inflated. Thus, we computed Type 2 AUROC based on participants' performance *after* the third reversal trial in order to minimize the extent to which any initial inflation of Type 1 accuracy would bias the estimation of metacognitive sensitivity. Type 2 AUROC scores for Experiments 1 ( $M = 0.71$ ,  $SD = 0.09$ ) and 2 ( $M = 0.72$ ,  $SD = 0.08$ ) are shown in Fig 2C and 2D, respectively. No significant difference was observed between the two experiments,  $t(103.15) = -0.36$ ,  $p = 0.72$ .

Test-retest reliability of control level threshold estimation was assessed by evaluating the correlation between the average of each participant's control levels on the 8th to 10th reversal trials and the average of the subject's control levels on the 11th to 13th reversal trials. Spearman rank correlation tests were used to minimize the influence of extreme values. Positive correlations were observed in both experiments [Experiment 1:  $r(51) = 0.90$ ,  $p < 0.001$ , Fig 3A; Experiment 2:  $r(52) = 0.83$ ,  $p < 0.001$ , Fig 3B]. Because control thresholds were densely clustered at low levels, as shown by Shapiro-Wilk's tests [Experiment 1, reversals 8-10:  $W(52) = 0.75$ ,  $p < 0.001$ ; Experiment 1, reversals 11-13:  $W(52) = 0.69$ ,  $p < 0.001$ ; Experiment 2, reversals 8-10:  $W(53) = 0.69$ ,  $p < 0.0001$ ; Experiment 2, reversals 11-13:  $W(53) = 0.66$ ,  $p < 0.0001$ ; Figs 3A,B], split-half relationships between log transformed control thresholds are shown (Fig 4) to visually confirm that the observed reliability was not simply driven by extreme values. To further

validate the test-retest reliability of control threshold estimation, we also found that the two control thresholds estimated for each participant from the eighth through thirteenth reversals of each individual staircase were significantly correlated [Experiment 1:  $r(51) = 0.82$ ,  $p < 0.0001$ ; Experiment 2:  $r(52) = 0.81$ ,  $p < 0.0001$ ].

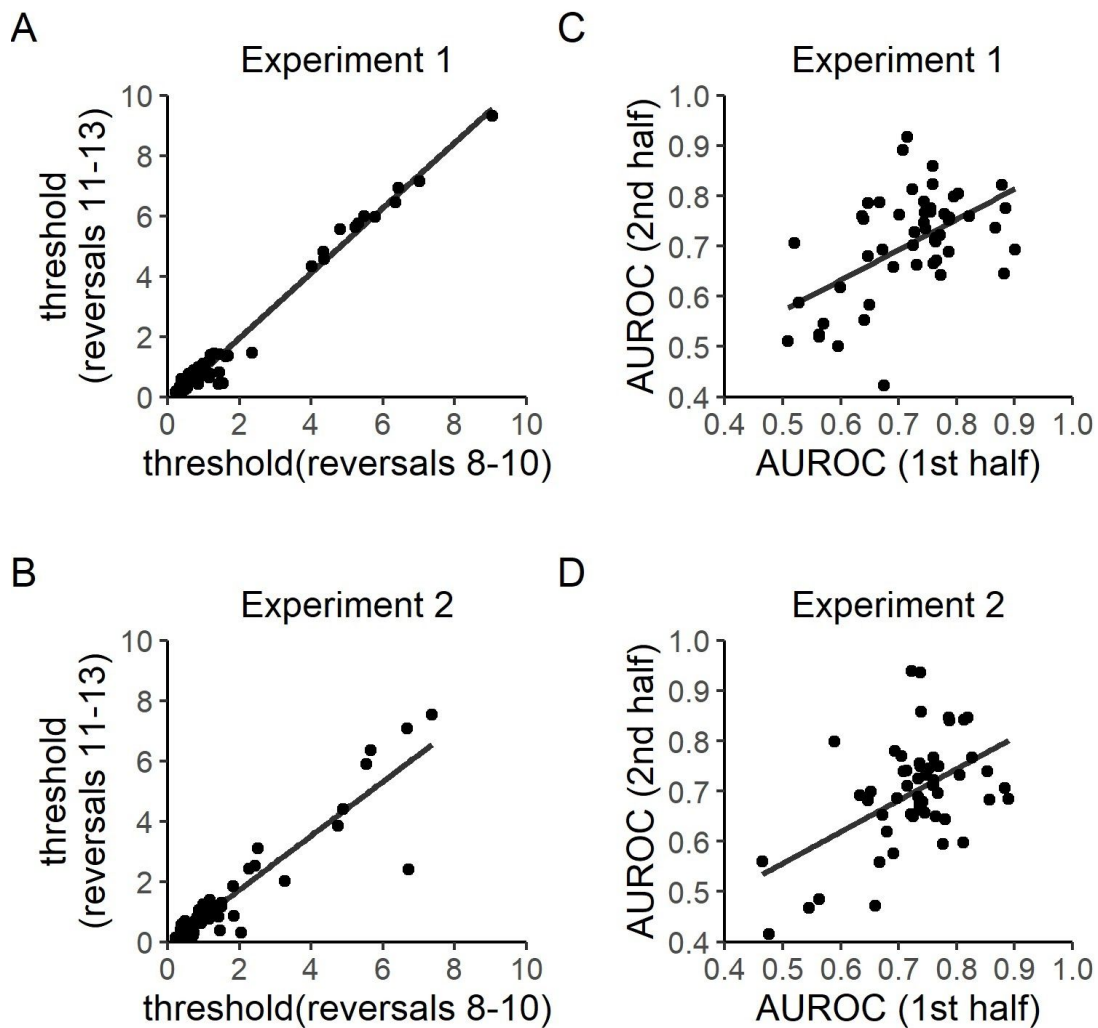

**Fig 3. Test-retest reliability.** A) Test-retest reliability of control level thresholds in Experiment 1. The average of each participant's control levels in the 8th to 10th reversal trials was correlated

with that in the 11th to 13th reversal trials. A positive correlation was observed,  $r(51) = 0.90$ ,  $p < 0.001$ . B) Test-retest reliability of control level thresholds in Experiment 2. A positive correlation was found,  $r(52) = 0.83$ ,  $p < 0.001$ . C) Test-retest reliability of Type 2 AUROC in Experiment 1. Participants' Type 2 AUROC in the first half of the study was significantly correlated with that in the second half of the study,  $r(51) = 0.43$ ,  $p = 0.001$ . D) Test-retest reliability of Type 2 AUROC in Experiment 2. Again, a positive correlation was found between the two halves of the experiment,  $r(52) = 0.37$ ,  $p = 0.006$ . All correlation coefficients were computed by Spearman rank tests. Lines of best fit were computed by the ordinary least squares method.

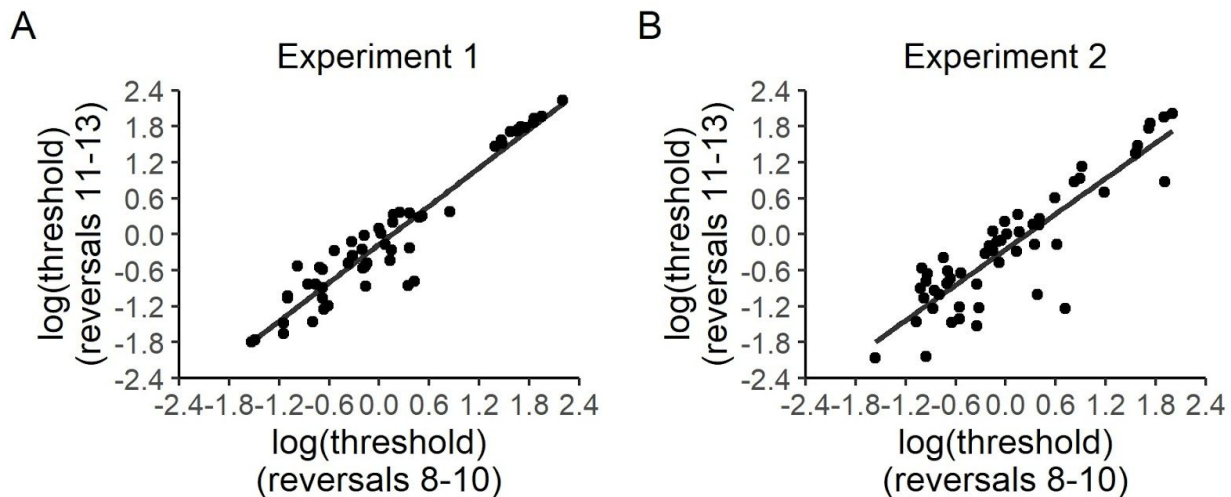

**Fig 4. Test-retest reliability of log-transformed control level thresholds in Experiments 1**

**(A) and 2 (B).** Spearman rank correlation coefficients for log-transformed control thresholds are the same as those reported for non-transformed control thresholds (Fig 3A,B). The transformed data shown here are intended to provide additional visual evidence that the observed test-retest reliability of control thresholds is not simply driven by extreme values.



To again avoid the influence of early inflation of Type 1 performance, data after the third reversal trial was used to check the test-retest reliability of Type 2 AUROC estimates. A positive correlation was found between participants' Type 2 AUROC in the first and second half of both experiments [Experiment 1:  $r(51) = 0.43$ ,  $p = 0.001$ , Fig 3C; Experiment 2:  $r(52) = 0.37$ ,  $p = 0.006$ , Fig 3D].

## Discussion

The dot trajectory task introduced here was designed to quantify participants' sense of movement agency quickly and reliably. The present test-retest reliability results suggest that both agency control thresholds and metacognitive sensitivity can be reliably estimated from this relatively short (fewer than 100 trials) online thresholding procedure.

The current task has several advantages over previous paradigms for quantifying self-agency. First, it avoids biases and memory confounds that may be inherent to paradigms using subjective timing judgments like the Libet clock paradigm [16] or paradigms based on the intentional binding effect [3, 34]. Further, it improves upon other paradigms that have moved away from subjective timing judgments [35, 36] in the use of both adaptive staircasing and metacognitive judgments. Adaptive staircasing increases the task's flexibility and sensitivity to individual differences between participants, and also allows for between-subjects comparisons of metacognitive sensitivity (e.g., between patient and control groups) that are not confounded by Type 1 performance [37]. Importantly, this ensures that, if a difference in Type 1 control thresholds is indeed observed between patients and healthy controls, this difference will not obscure any potential *further* differences in metacognitive sensitivity between patients and

controls. In this regard, future results from this task could also potentially shed light on an extant debate about the extent to which the sense of agency is metacognitive in nature [38]. Further, the significant test-retest reliability for agency control thresholds and metacognitive sensitivity observed in both experiments suggests that the task overcomes a common limitation of weak measurement stability in behavioral tasks [11]. However, to further confirm this, the current results should be replicated in a larger sample, as larger sample sizes can reduce estimates of measurement reliability [11].

Going forward, the next step will be to compare these measures between patients and healthy controls. Continuing with the example of FMDs, we hypothesize that patients' control level thresholds will be higher than that of healthy controls. The dot trajectory task requires participants to compare predicted dot trajectories with real trajectories. While the real trajectories are represented by visual input, predicted trajectories are a combination of perceived trajectories and participants' inner prediction based on hand movements. Because FMD patients have impaired inner predictions [19], their predicted trajectories should be less accurate than those of the controls. Therefore, patients with FMDs should require greater control levels to reach 75% accuracy on the dot trajectory task than controls. Similarly, because FMD patients display impaired somatosensory metacognition [20, 26], we predict that they will have lower Type 2 AUROC compared to healthy controls.

The dot trajectory task may also have broader applicability for the diagnosis of other agency-related disorders whose primary symptoms are not movement-based. For example, some schizophrenia patients have demonstrated an excessive sense of self-agency, such that they tend to consider movements generated by others as being self-generated [36, 39]. Such patients may

experience difficulty distinguishing dot movements generated by themselves from those created by the program. This would be expected to manifest in a response profile similar to that predicted for FMD patients: higher Type 1 error rates (and thus, higher control thresholds) and inflated confidence ratings on incorrect trials (and thus, lower type 2 AUROC) relative to healthy participants.

The present study has at least two limitations. First, participants provided Type 1 and Type 2 responses in two separate questions with a fixed order. This may allow information accumulated after the Type 1 response to be incorporated into Type 2 judgments, which could lead to inaccurate assessment of metacognitive sensitivity [40]. Thus, future studies may benefit from asking participants to indicate the target dot and rate confidence simultaneously [41]. Second, the motivation for healthy controls and patients may be different. Patients may participate more actively as the task is directly related to their condition, while online subjects are often motivated primarily by moderate monetary rewards. Such discrepancies could make it more difficult to observe any real differences between the two populations, thereby limiting the task's diagnostic potential. Therefore, any procedural modifications that may increase motivation in healthy participants, such as increased monetary rewards or bonuses, could be important moving forward.

In conclusion, the dot trajectory task introduced here is able to estimate two new measures of movement self-agency efficiently and reliably in healthy participants. We hope that future implementations of this novel task in studies with patients can improve our ability to both understand and diagnose agency-related disorders.

## Acknowledgments

We would like to thank Mouslim Cherkaoui and Angela Clague for helping conduct the study and providing useful feedback.

## References

1. Tsakiris M, Schuetz-Bosbach S, Gallagher S. On agency and body ownership: Phenomenological and neurocognitive reflections. *Conscious Cogn*. 2007 Sep;16(3):645-660. doi: 10.1016/j.concog.2007.05.012.
2. Fried I, Haggard P, He BJ, Schurger A. Volition and action in the human brain: Processes, pathologies, and reasons. *J Neurosci*. 2017 Nov 8;37(45): 10842-10847. doi: 10.1523/JNEUROSCI.2584-17.2017.
3. Ricciardi L, Haggard P, de Boer L, Sorbera C, Stenner M, Morgante F, et al. Acting without being in control: Exploring volition in Parkinson's disease with impulsive compulsive behaviors. *Parkinsonism Relat Disord*. 2017 Jul;40:51-57. doi: 10.1016/j.parkreldis.2017.04.011.
4. Biran I, Chatterjee A. Alien hand syndrome. *Arch Neurol*. 2004 Feb;61(2): 292–294. doi: 10.1001/archneur.61.2.292.
5. Pierre JM. The neuroscience of free will: Implications for psychiatry. *Psychol Med*. 2014 Sep;44(12):2465-2474. doi: 10.1017/S0033291713002985.
6. Delorme C, Roze E, Grabli D, Mayer J, Degos B, Vidailhet M, et al. Explicit agency in patients with cervical dystonia: Altered recognition of temporal discrepancies between

- motor actions and their feedback. PLoS One. 2016 Aug;11:e0162191. doi: 10.1371/journal.pone.0162191.
7. Armstrong MJ, Okun MS. Diagnosis and treatment of Parkinson Disease: A review. JAMA. 2020 Feb 11;323(6):548–560. doi: 10.1001/jama.2019.22360.
  8. Jinnah HA, Factor SA. Diagnosis and treatment of dystonia. Neurol Clin. 2015 Feb;33(1):77–100. doi:10.1016/j.ncl.2014.09.002.
  9. Patel KR, Cherian J, Gohil K, Atkinson D. Schizophrenia: Overview and treatment options. P T. 2014 Sep;39(9):638–645.
  10. Eisenberg IW, Bissett PG, Enkavi AZ, Li J, MacKinnon DP, Marsch LA, et al. Uncovering the structure of self-regulation through data-driven ontology discovery. Nat Commun. 2019 May;10(1):2319. doi: 10.1038/s41467-019-10301-1.
  11. Enkavi AZ, Eisenberg IW, Bissett PG, Mazza GL, MacKinnon DP, Marsch LA, et al. Large-scale analysis of test-retest reliabilities of self-regulation measures. Proc Natl Acad Sci U S A. 2019 Mar;116(12):5472-5477. doi: 10.1073/pnas.1818430116.
  12. Libet B, Gleason CA, Wright EW, Pearl DK. Time of conscious intention to act in relation to onset of cerebral activity (readiness-potential). The unconscious initiation of a freely voluntary act. Brain. 1983 Sep;106(3):623-642. doi: 10.1093/brain/106.3.623.
  13. Gomes G. The interpretation of Libet's results on the timing of conscious events: A commentary. Conscious Cogn. 2002 Jun;11(2):221-230. doi: 10.1006/ccog.2002.0556.
  14. Dannett DC, Kinsbourne M. Time and the observer: The where and when of consciousness in the brain. Behav Brain Sci. 1992;15(2):183-247. doi: 10.1017/S0140525X00068229.

15. Libet B. Unconscious cerebral initiative and the role of conscious will in voluntary action. *Behav Brain Sci.* 1985;8:529-566.
16. Matsushashi M, Hallett M. The timing of the conscious intention to move. *Eur J Neurosci.* 2008 Dec;28(11):2344-2351. doi: 10.1111/j.1460-9568.2008.06525.x.
17. Hauser M, Moore JW, de Millas W, Gallinat J, Heinz A, Haggard P, et al. Sense of agency is altered in patients with a putative psychotic prodrome. *Schizophr Res.* 2011 Mar;126(1-3):20–27. doi: 10.1016/j.schres.2010.10.031.
18. Kranick SM, Hallett M. Neurology of volition. *Exp Brain Res.* 2013;229(3):313-327. doi: 10.1007/s00221-013-3399-2.
19. Voon V, Gallea C, Hattori N, Bruno M, Ekanayake V, Hallett M. The involuntary nature of conversion disorder. *Neurology.* 2010 Jan 19;74(3):223-228. doi: 10.1212/WNL.0b013e3181ca00e9.
20. Edwards MJ, Moretto G, Schwingenschuh P, Katschnig P, Bhatia KP, Haggard P. Abnormal sense of intention preceding voluntary movement in patients with psychogenic tremor. *Neuropsychologia.* 2011 Jul;49(9):2791-2793. doi: 10.1016/j.neuropsychologia.2011.05.021.
21. Decety J, Lamm C. The role of the right temporoparietal junction in social interaction: How low-level computational processes contribute to meta-cognition. *Neuroscientist.* 2007 Dec;13(6):580-593. doi: 10.1177/1073858407304654.
22. Farrer C, Frey SH, Van Horn JD, Tunik E, Turk D, Inati S, et al. The angular gyrus computes action awareness representations. *Cereb Cortex.* 2008 Feb;18(2):254-261. doi: 10.1093/cercor/bhm050.

23. Maurer CW, LaFaver K, Ameli R, Epstein SA, Hallett M, Horovitz SG. Impaired self-agency in Functional Movement Disorders: A resting-state fMRI study. *Neurology*. 2016 Aug 9;87(6):564-570. doi: 10.1212/WNL.0000000000002940
24. Brown P, Thompson PD. Electrophysiological aids to the diagnosis of psychogenic jerks, spasms, and tremor. *Mov Disord*. 2001 Jul;16(4):595-599. doi: 10.1002/mds.1145.
25. Factor SA, Podskalny GD, Molho ES. Psychogenic movement disorders: Frequency, clinical profile, and characteristics. *J Neurol Neurosurg Psychiatry*. 1995 Oct;59(4):406-412. doi: 10.1136/jnnp.59.4.406
26. Kranick SM, Moore JW, Yusuf N, Martinez VT, LaFaver K, Edwards MJ, et al. Action-effect binding is decreased in motor conversion disorder: Implications for sense of agency. *Mov Disord*. 2013 Jul;28(8):1110-1116. doi: 10.1002/mds.25408
27. McAuley J, Rothwell J. Identification of psychogenic, dystonic, and other organic tremors by a coherence entrainment test. *Mov Disord*. 2004 Mar;19(3):253-267. doi: 10.1002/mds.10707.
28. Fahn S, Williams DT. Psychogenic dystonia. *Adv Neurol*. 1988;50:431-455.
29. Williams DT, Ford B, Fahn S. Phenomenology and psychopathology related to psychogenic movement disorders. *Adv Neurol*. 1995;65:231-257.
30. Kingdom FAA, Prins N. *Psychophysics: A practical introduction*. 1<sup>st</sup> ed. San Diego: Elsevier Academic Press; 2010.
31. Galvin SJ, Podd JV, Drga V, Whitmore J. Type 2 tasks in the theory of signal detectability: discrimination between correct and incorrect decisions. *Psychon Bull Rev*. 2003;10(4):843-876. doi: 10.3758/BF03196546.

32. Maniscalco B, Lau H. A signal detection theoretic approach for estimating metacognitive sensitivity from confidence ratings. *Conscious Cogn.* 2012;21(1):422-430. doi: 10.1016/j.concog.2011.09.021
33. Maniscalco B, Lau H. Signal detection theory analysis of type 1 and type 2 data: Meta-d', response-specific meta-d', and the unequal variance SDT model. In: Fleming SM, Frith CD, editors. *The cognitive neuroscience of metacognition*. New York: Springer-Verlag Publishing; 2014. pp. 25-66.
34. Haggard P, Clark S. Intentional action: Conscious experience and neural prediction. *Conscious Cogn.* 2003 Dec;12:695-707. doi: 10.1016/s1053-8100(03)00052-7.
35. Daprati E, Franck N, Georgieff N, Proust J, Pacherie E, Dalery J, et al. Looking for the agent: an investigation into consciousness of action and self-consciousness in schizophrenic patients. *Cognition.* 1997 Dec;65(1):71–86. doi: 10.1016/s0010-0277(97)00039-5.
36. Schimansky J, David N, Rössler W, Haker H. Sense of agency and mentalizing: Dissociation of subdomains of social cognition in patients with schizophrenia. *Psychiatry Res.* 2010;178(1), 39–45.
37. Lau H. Are we studying consciousness yet? In: Weiskrantz L, Davies M, editors. *Frontiers of Consciousness: Chichele Lectures*. Oxford: Oxford University Press; 2008. pp. 2008-2245.
38. Chambon V, Filevich E, Haggard P. What is the Human Sense of Agency, and is it Metacognitive? In: Fleming SM, Frith CD, editors. *The Cognitive Neuroscience of Metacognition*. Heidelberg: Springer Berlin Heidelberg; 2014. pp. 321-342.



39. Garbarini F, Mastropasqua A, Sigaud M, Rabuffetti M, Piedimonte A, Pia L, et al.  
Abnormal sense of agency in patients with Schizophrenia: Evidence from bimanual coupling paradigm. *Front Behav Neurosci.* 2016;10:43. doi: 10.3389/fnbeh.2016.00043.
40. Fleming SM, Daw ND. Self-evaluation of decision-making: A general Bayesian framework for metacognition computation. *Psychol Rev.* 2017 Jan;124(1):91-114.  
doi: 10.1037/rev0000045
41. Matthews J, Nagao K, Ding C, Newby R, Kempster P, Hohwy J. Raised visual contrast thresholds with intact attention and metacognition in functional motor disorder. *Cortex.* 2020;125:161-174. doi: 10.1016/j.cortex.2019.12.009
